# Supplementary material for: Preparation of graphene/copper composites with a thiophenol molecular junction for thermal conduction application
Source: Royal Society of Chemistry journal article supplement (doi:10.1039/d2nj00374k), 2022-01-01
Supplement: d2nj00374k1.pdf [file d2nj00374k1.pdf]

*Supplementary information*

**Preparation of graphene/copper composite with thiophenol molecular junction  
for thermal conductive application**

Xiaofang Li<sup>a,b</sup>, Jianwen Miu<sup>b</sup>, Meng An<sup>b</sup>, Jing Mei<sup>b</sup>, Fenghua Zheng<sup>b</sup>, Juantao Jiang<sup>b\*</sup>, Hongqiang

Wang<sup>b</sup>, Youguo Huang<sup>b\*</sup>, and Qingyu Li<sup>b</sup>

<sup>a</sup>*School of Food and Chemical Engineering, Shaoyang University, Shaoyang 422000, China*

<sup>b</sup>*School of Chemical and Pharmaceutical Science, Guangxi Key Laboratory of Low Carbon*

*Energy Materials, Guangxi Normal University, Guilin 541004, China*

E-mail: jtjiang@gxnu.edu.cn; huangyg72@163.com

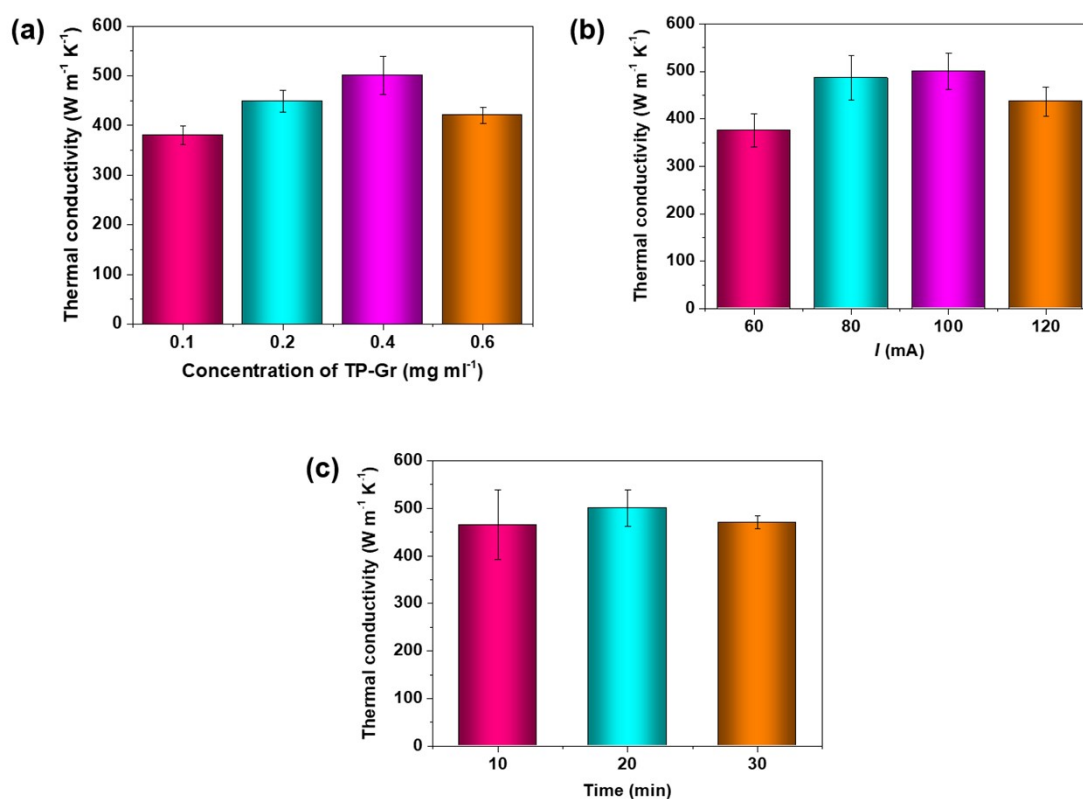

**Fig. S1.** Effect of (a) TP-Gr concentration, (b) current, (c) electroplating time and (d) temperature on the thermal conductivity.
